# Supplementary material
Source: Elsevier journal article supplement (https://univ-rennes.hal.science/hal-01274117v1/file/mmc1.pdf)
Supplement: mmc1 [file mmc1.pdf]

# A Highly Efficient and Stable Oxygen Reduction Reaction on Pt/CeO<sub>x</sub>/C Electrocatalyst Obtained via a Sacrificial Precursor Based on a Metal-Organic Framework.

Yun Luo,<sup>[a]</sup> Laura Calvillo,<sup>[b]</sup> Carole Daignebonne,<sup>[c]</sup> Maria K. Daletou,<sup>[d]</sup> Gaetano Granozzi<sup>[b]</sup> and Nicolas Alonso-Vante<sup>[a]\*</sup>

<sup>[a]</sup> IC2MP, UMR-CNRS 7285, University of Poitiers, 4 rue Michel Brunet, 86022 Poitiers, France.

<sup>[b]</sup> Department of Chemical Sciences, University of Padova, Via Marzolo 1, 35131 Padova, Italy.

<sup>[c]</sup> INSA, UMR-CNRS 6226, INSA de Rennes, 20 Avenue des Buttes de Coësmes, 35708 Rennes, France.

<sup>[d]</sup> Foundation of Research and Technology, Hellas-Institute of Chemical Engineering Science, Stadiou Str, Platani Rion, Patras GR-26504, Greece.

\*E-mail: nicolas.alonso.vante@univ-poitiers.fr

## **Context:**

Section 1: Results of X-ray photoelectron spectroscopy (XPS).

Section 2: Results of electrochemistry for SMOF and SCNT samples.

Section 3: Accelerated stability test for SMOF-3, SCNT-2 and Pt/C (JM) samples.

Section 4: IR-drop correction for micro laminar flow fuel cell.

**Section 1: Results of X-ray photoelectron spectroscopy (XPS).**

| Table S1-1. Analysis of the Pt 4fXPS data for the SMOF-1 and SMOF-3 materials |                                                             |                  |                  |
|-------------------------------------------------------------------------------|-------------------------------------------------------------|------------------|------------------|
| Sample                                                                        | Single chemical components of the Pt 4f <sub>7/2</sub> peak |                  |                  |
|                                                                               | Pt <sup>0</sup>                                             | Pt <sup>2+</sup> | Pt <sup>4+</sup> |
| SMOF-1                                                                        | 71.2 eV                                                     | 72.9 eV          | 74.6 eV          |
|                                                                               | 1.3                                                         | 1.5              | 1.5              |
|                                                                               | 80.5 %                                                      | 11.8 %           | 8.0 %            |
| SMOF-3                                                                        | 71.1 eV                                                     | 72.9 eV          | 74.7 eV          |
|                                                                               | 1.3                                                         | 1.5              | 1.5              |
|                                                                               | 84.0 %                                                      | 8.8 %            | 7.2 %            |

| Table S1-2. Analysis of the C 1sXPS data for for the SMOF-1 and SMOF-3 materials |                                             |                   |          |                 |                   |
|----------------------------------------------------------------------------------|---------------------------------------------|-------------------|----------|-----------------|-------------------|
| Sample                                                                           | Single chemical components of the C 1s peak |                   |          |                 |                   |
|                                                                                  | C sp <sup>2</sup>                           | C sp <sup>3</sup> | Alcohols | Carbonyl groups | Carboxylic groups |
| SMOF-1                                                                           | 284.3 eV                                    | 285.4 eV          | 286.6 eV | 288.0 eV        | 289.1 eV          |
|                                                                                  | 1.1                                         | 1.4               | 1.4      | 1.4             | 1.4               |
|                                                                                  | 60.9 %                                      | 20.4 %            | 7.9 %    | 3.5 %           | 7.3 %             |
| SMOF-3                                                                           | 284.4 eV                                    | 285.5 eV          | 286.6 eV | ----            | 289.1 eV          |
|                                                                                  | 1.1                                         | 1.4               | 1.4      |                 | 1.4               |
|                                                                                  | 86.3 %                                      | 8.1 %             | 3.1 %    |                 | 2.5 %             |

| Table S1-3. Analysis of the Ce 3d XPS data for SMOF-1 and SMOF-3 materials |                                                                                 |                         |
|----------------------------------------------------------------------------|---------------------------------------------------------------------------------|-------------------------|
| Sample                                                                     | Single chemical components of the Ce 3d <sub>5/2</sub> peak (Ce <sup>3+</sup> ) |                         |
|                                                                            | f <sup>2</sup>                                                                  | f <sup>1</sup>          |
| SMOF-1                                                                     | 882.1 eV<br>2.8<br>14.5 %                                                       | 886.2 eV<br>5<br>85.5 % |
| SMOF-3                                                                     | 882.3 eV<br>3.2<br>26 %                                                         | 886.2 eV<br>4.6<br>74 % |

## Section 2: Results of electrochemistry for SMOF and SCNT samples.

| Table S2. Electrochemical surface area (ECSA / m <sup>2</sup> g <sup>-1</sup> <sub>Pt</sub> ) derived from the H <sub>upd</sub> region and CO-stripping, as well as the geometric surface area calculated from the mean particle size. |                          |                     |                        |
|----------------------------------------------------------------------------------------------------------------------------------------------------------------------------------------------------------------------------------------|--------------------------|---------------------|------------------------|
| Sample                                                                                                                                                                                                                                 | ECSA (H <sub>upd</sub> ) | ECSA (CO-stripping) | Geometric surface area |
| SMOF-1                                                                                                                                                                                                                                 | 48 ± 3                   | 53 ± 10             | 140                    |
| SMOF-2                                                                                                                                                                                                                                 | 56 ± 2                   | 58 ± 9              | 90                     |
| SMOF-3                                                                                                                                                                                                                                 | 72 ± 5                   | 68 ± 3              | 55                     |
| SCNT-1                                                                                                                                                                                                                                 | 64 ± 4                   | 72 ± 3              | 122                    |
| SCNT-2                                                                                                                                                                                                                                 | 48 ± 3                   | 60 ± 2              | 58                     |
| SCNT-3                                                                                                                                                                                                                                 | 21 ± 2                   | 6 ± 1               | 23                     |
| Pt/C (JM)                                                                                                                                                                                                                              | 78 ± 3                   | 66 ± 2              | 133                    |

### Section 3: Accelerated durability test (ADT) for SMOF-3, SCNT-2 and Pt/C (JM)

samples in the potential interval of 0.6 – 1.0 V/RHE.

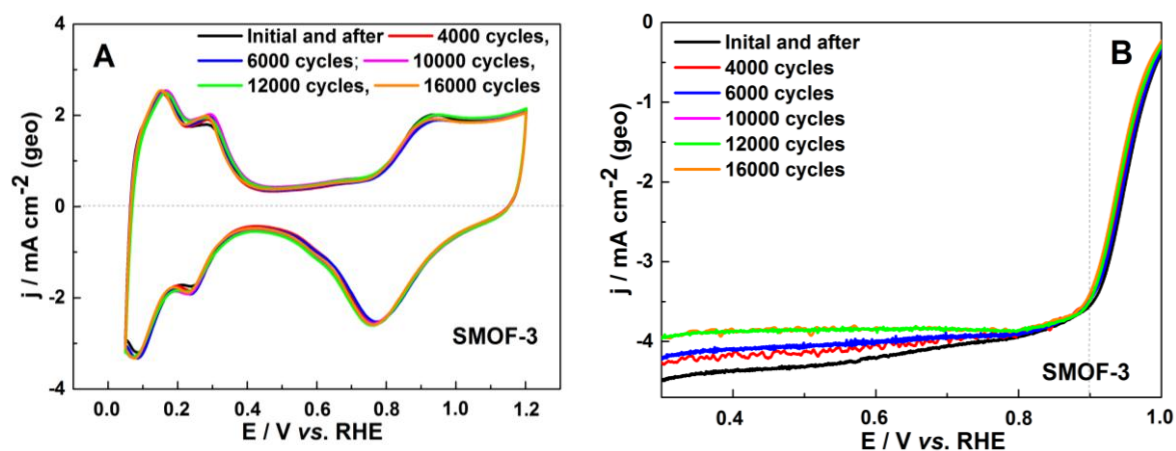

Figure S3-1. (A) CVs recorded at scan rate of  $50 \text{ mV s}^{-1}$  in  $\text{N}_2$ -saturated  $0.1 \text{ M HClO}_4$  and (B) LSVs on RDE with rotating speed of  $900 \text{ rpm}$  at scan rate of  $5 \text{ mV s}^{-1}$  in  $\text{O}_2$ -saturated  $0.1 \text{ M HClO}_4$  during stability test for SMOF-3 sample.

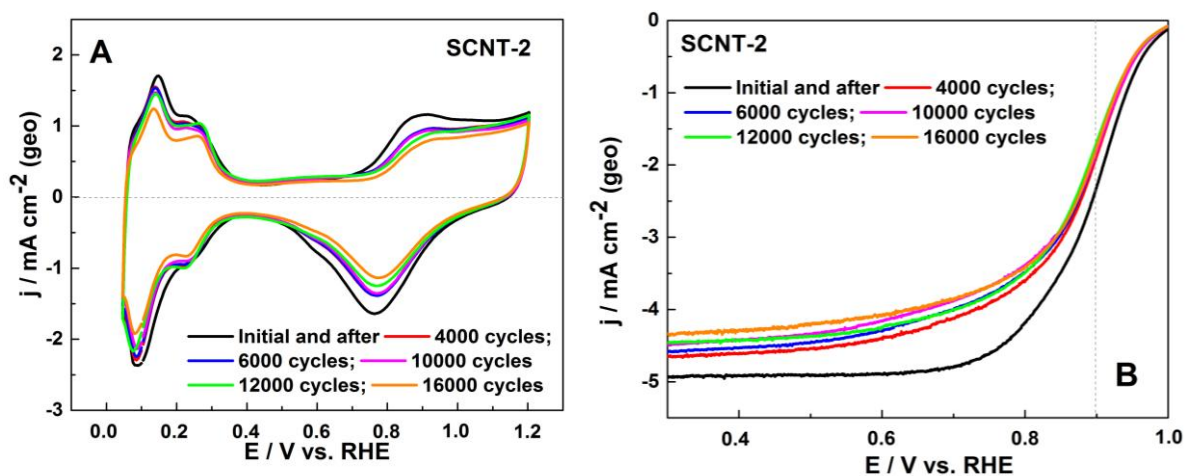

Figure S3-2. (A) CVs recorded at scan rate of  $50 \text{ mV s}^{-1}$  in  $\text{N}_2$ -saturated  $0.1 \text{ M HClO}_4$  and (B) LSVs on RDE with rotating speed of  $900 \text{ rpm}$  at scan rate of  $5 \text{ mV s}^{-1}$  in  $\text{O}_2$ -saturated  $0.1 \text{ M HClO}_4$  during the durability test for SCNT-2 sample.

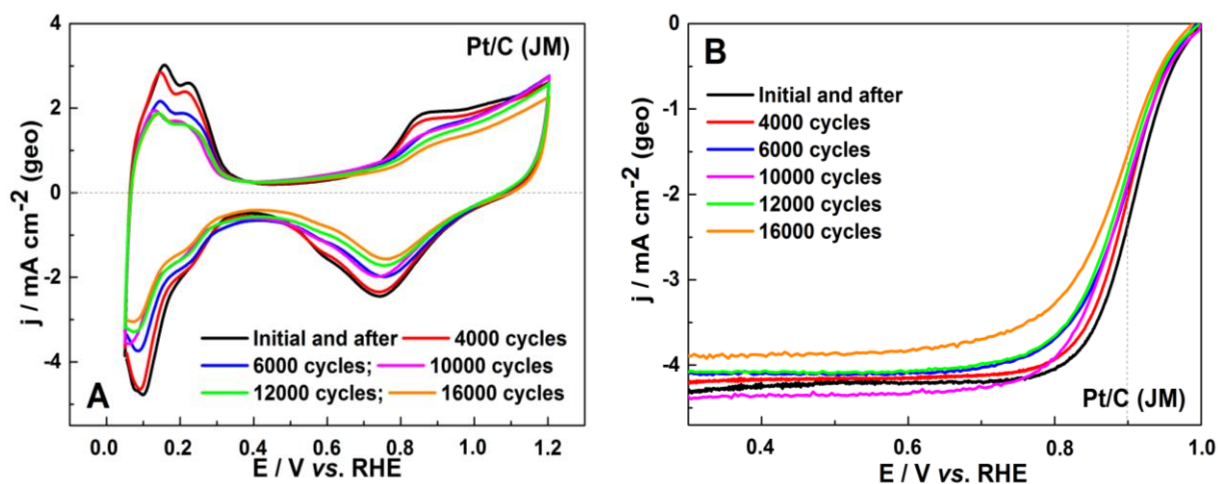

Figure S3-3. (A) CVs recorded at scan rate of  $50 \text{ mV s}^{-1}$  in  $\text{N}_2$ -saturated  $0.1 \text{ M HClO}_4$ ; and (B) LSVs on RDE with rotating speed of  $900 \text{ rpm}$  at scan rate of  $5 \text{ mV s}^{-1}$  in  $\text{O}_2$ -saturated  $0.1 \text{ M HClO}_4$  during the durability test for Pt/C (JM).

#### Section 4: IR-drop correction for micro laminar flow fuel cell.

IR-drop of micro fuel cell was measured using the PEIS method with a potentiostat/galvanostat (SP-300 Biologic Science Instruments) applying a frequency of  $10 \text{ kHz}$  in a punctual measurement of the assembled micro-fluidic cell. Resistance values for cathode and anode are summarized in **Table S3**. The corrected electrodes' potential, cell potential and power density was done using equations (1 – 4).

$$E'(\text{cathode}) = E(\text{cathode}) + i(\text{cathode}) \times R(\text{cathode})/1000 \quad (1)$$

$$E'(\text{anode}) = E(\text{anode}) - i(\text{anode}) \times R(\text{anode})/1000 \quad (2)$$

$$E'(\text{cell}) = E'(\text{cathode}) - E'(\text{anode}) \quad (3)$$

$$P = E'(\text{cell}) \times i \quad (4)$$

Where  $E'$  is the ohmic-drop (iR-drop) corrected potential,  $E$  recorded raw potential value,  $i$  current,  $R$  value of iR drop,  $P$  power density. The raw data without correction were shown in Figure S4.

| Cathode | SMOF-1 | SMOF-2 | SMOF-3 | SCNT-1 | SCNT-2 | SCNT-3 | Pt/C (JM) |
|---------|--------|--------|--------|--------|--------|--------|-----------|
| iR-drop | 0.97   | 0.93   | 1.10   | 0.50   | 0.50   | 0.78   | 0.79      |
| Anode:  | Pt/C   | Pt/C   | Pt/C   | Pt/C   | Pt/C   | Pt/C   | Pt/C (JM) |
|         | (JM)   | (JM)   | (JM)   | (JM)   | (JM)   | (JM)   |           |
| iR-drop | 0.70   | 1.00   | 0.92   | 0.70   | 0.97   | 0.85   | 0.92      |

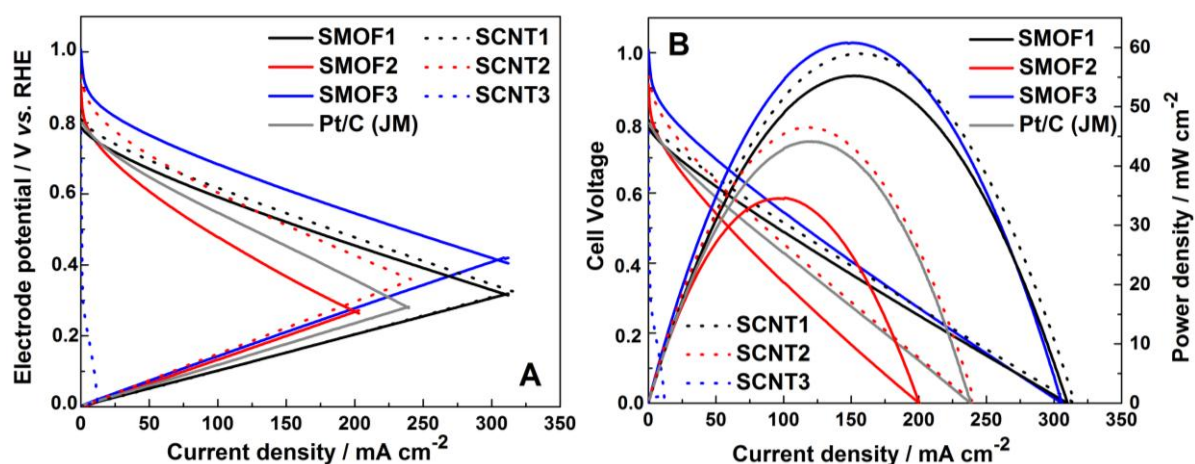

**Figure S4.** (A) Corresponding representative anode and cathode non-IR corrected polarization curves of a  $H_2/O_2$   $\mu$ LFFC; and (B) cell voltage and power density curves. Pt/C (JM) catalyst was served as anode in all systems.
